# Supplementary material for: Neodb: a comprehensive neoantigen database and discovery platform for cancer immunotherapy
Source: Database (Oxford). 2023 Jun 13;2023:baad041. doi: 10.1093/database/baad041 (PMC10263465; doi:10.1093/database/baad041)
Supplement: baad041_Supp [file baad041_supp.zip]

Archive with 4 entries (4 files):
- suppl_data/Neodb_Database_supp.pdf
- suppl_data/Supplementary Table S1-Hyperparameters of Immuno-GNN model.xlsx
- suppl_data/Supplementary Table S2-Training dataset of Immuno-GNN model.xlsx
- suppl_data/Supplementary Table S3-Validation dataset.xlsx
