# Supplementary material for: Neodb: a comprehensive neoantigen database and discovery platform for cancer immunotherapy
Source: Database (Oxford). 2023 Jun 13;2023:baad041. doi: 10.1093/database/baad041 (PMC10263465; doi:10.1093/database/baad041)
Supplement: baad041_Supp [file baad041_supp.zip › suppl_data/Supplementary Table S1-Hyperparameters of Immuno-GNN model.xlsx]

## Sheet: Sheet1
Hyperparameters	Value
batch_size	8
learning_rate	0.0001
weight_decay	1.1e-05
model_embedding_size	64
model_dense_neurons	32
model_heads	3
model_layers	3
​
​
