# Supplementary material for: Neodb: a comprehensive neoantigen database and discovery platform for cancer immunotherapy
Source: Oxford University Press journal article supplement (doi:10.1093/database/baad041), 2023-01-01

**(A)** Literature search and data collection procedures **(B)** Word cloud drawn from the abstracts of final 203 literatures which contain experimentally validated neoantigens.

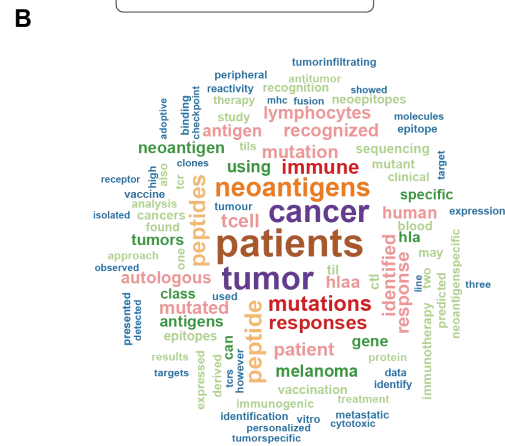

Supp Fig.2 The sequence logo of different length validated neoantigens.

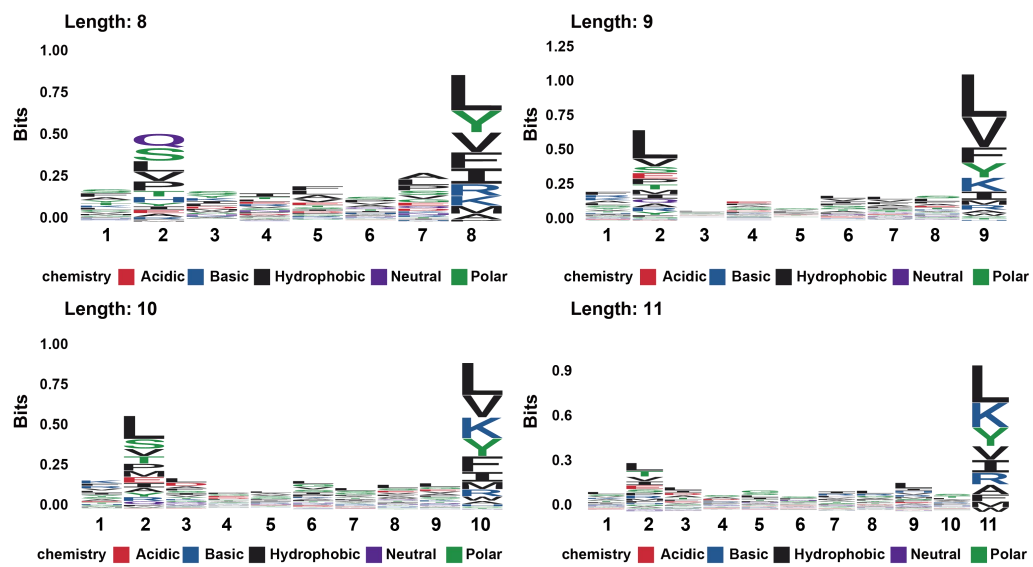

**Supp Fig.3 The distribution of HLA allele frequency in the Chinese population, and the top 20 most frequent HLA alleles of each sub-type were selected.**

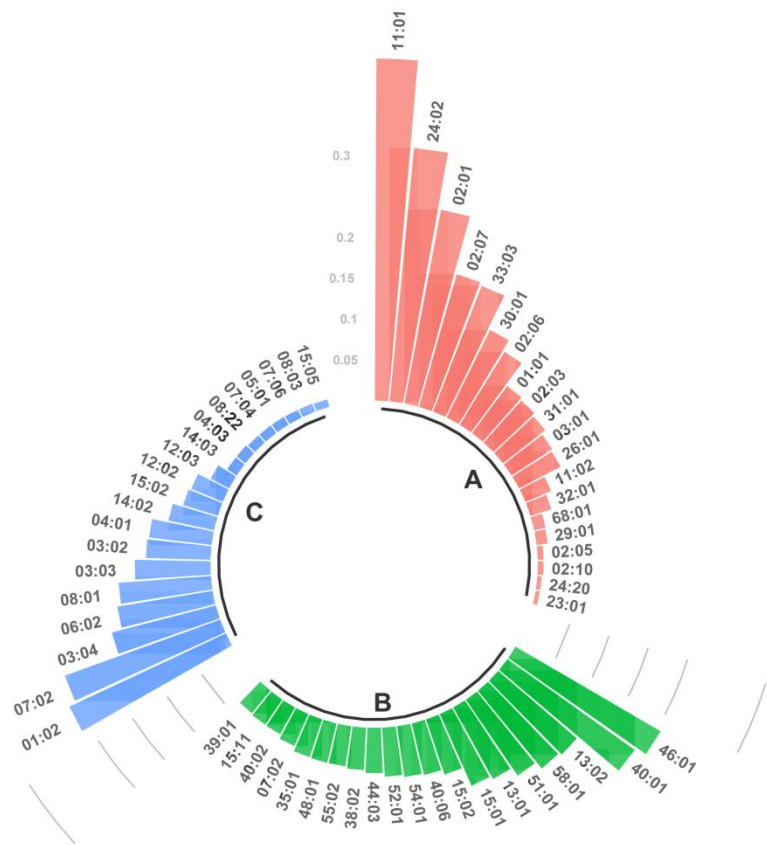

Supplement: baad041_supp.zip [file baad041_supp.zip]
